# Supplementary material for: Mitochondrial function controls intestinal epithelial stemness and proliferation
Source: PubMed Central journal article supplement (PMC5080445; doi:10.1038/ncomms13171), 2016-10-27
Supplement: ncomms13171-s1.pdf [file ncomms13171-s1.pdf]

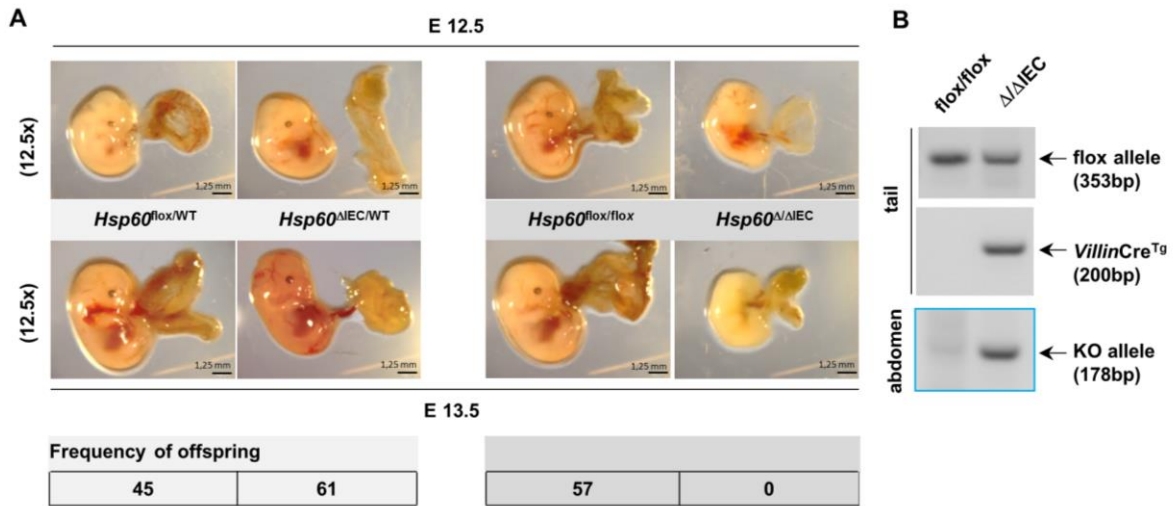

**Supplementary Figure 1: *Hsp60*<sup>ΔIEC</sup> mice are embryonically lethal**

(A) Light microscopic pictures show mouse embryos at developmental stage E12.5 and E13.5 prepared from uteri of dams and subsequently genotyped. The visceral yolk sac is placed right next to the embryos. The table shows the frequency of offspring carrying the corresponding genotypes. (B) Representative agarose gels validating the *Hsp60* knockout in embryonic abdominal samples of *Hsp60*<sup>flox/flox</sup> X *VillinCre*<sup>Tg</sup> mice.

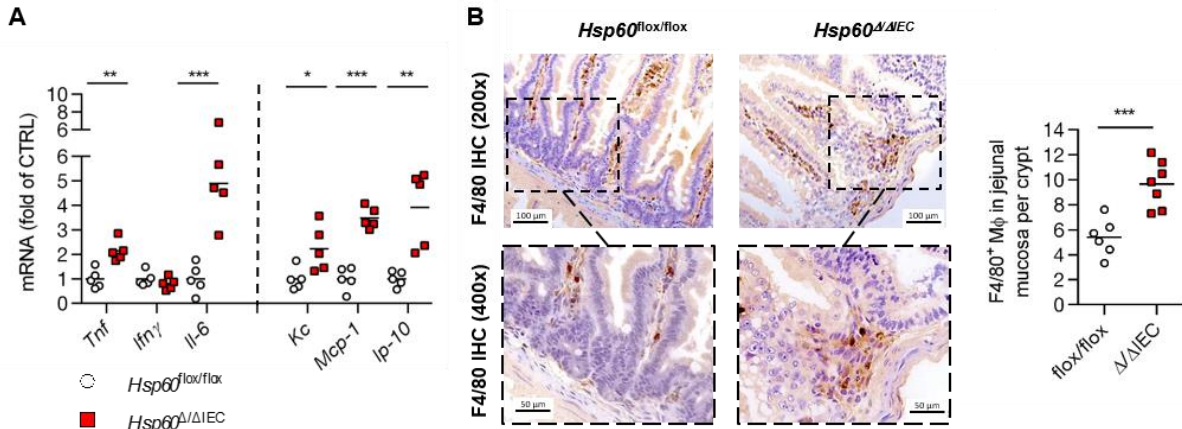

**Supplementary Figure 2: Mild signs of mucosal inflammation in jejunum of *Hsp60*<sup>Δ/ΔIEC</sup> mice**

(A) qRT-PCR analysis of cytokines and chemokines was performed on mRNA isolated from whole jejunal tissue pieces (N=5 per genotype). Statistical analysis was performed via t-test comparing genotypes. (B) Representative pictures including detailed images show macrophage infiltrates into jejunal mucosa. Quantification of infiltrating F4/80-positive macrophage into jejunal mucosa (evaluation of 20 crypts of one representative mouse per genotype). Lines in the dot plots indicate mean numbers. Asterisk indicate significant differences \*P<0.05; \*\*P<0.01; \*\*\*P<0.001.

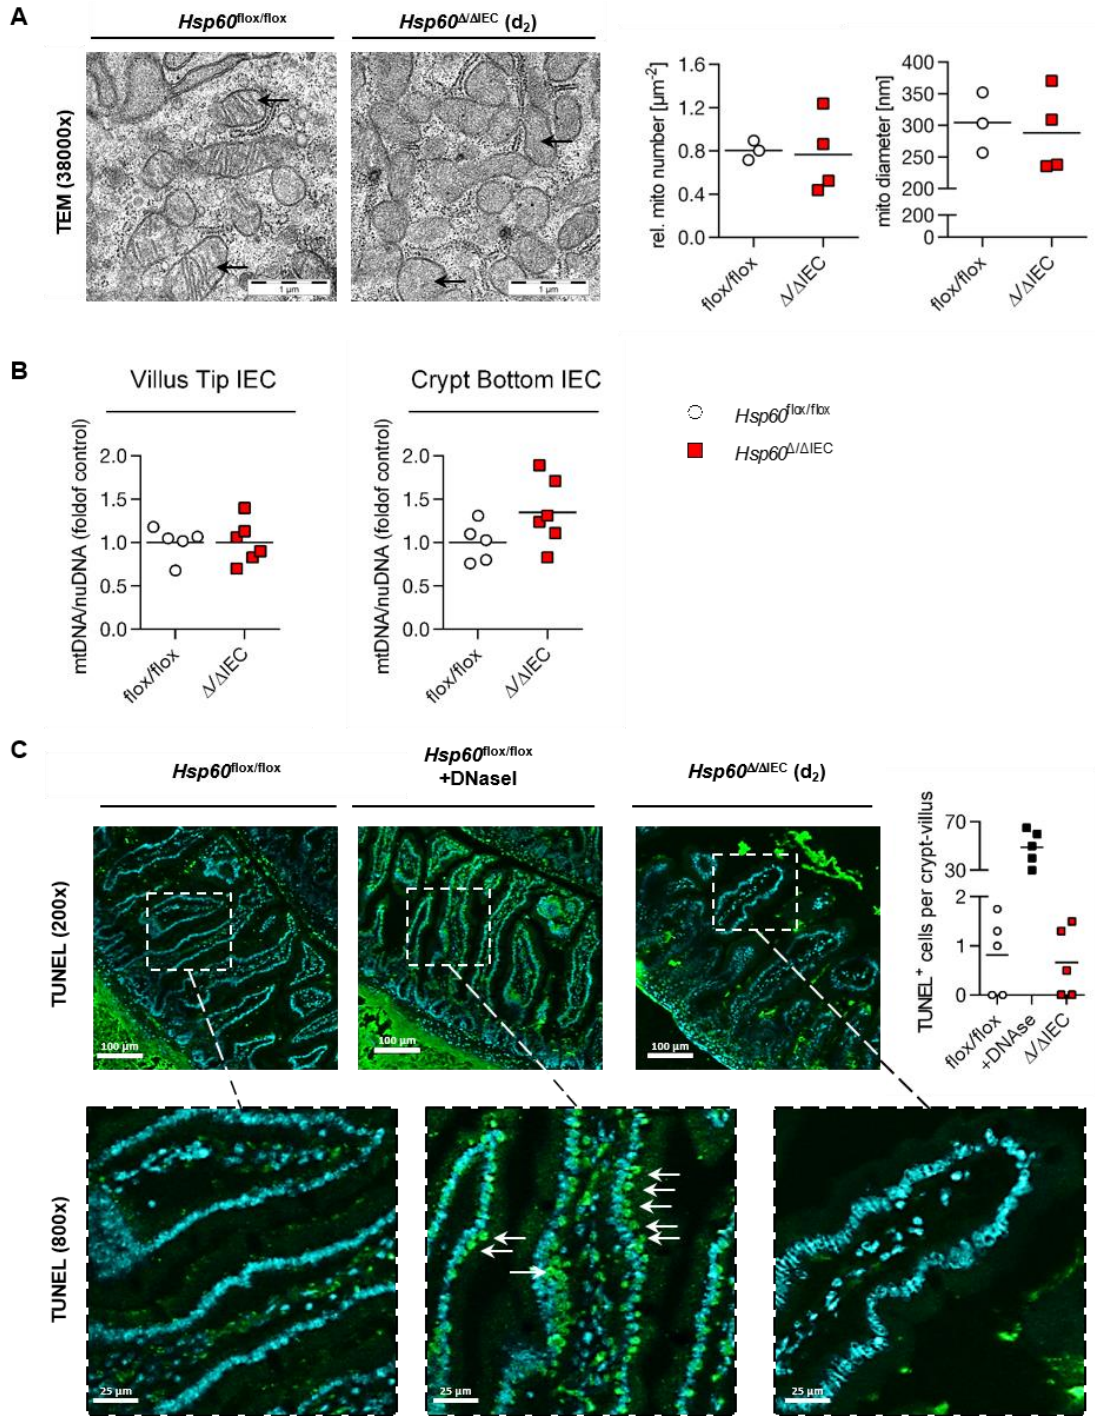

Supplementary Figure 3: HSP60 deficiency does not induce epithelial apoptosis or a loss of mitochondria

(A). The number and diameter of mitochondria in villus and crypt IEC was assessed by electron microscopy of jejunal sections. Arrows indicate differences in mitochondrial cristae formation in *Hsp60*<sup>ΔIEC</sup> vs. CTRL mice. Right: Mitochondrial numbers and diameter in *Hsp60*<sup>ΔIEC</sup> mice (N=4) and *Hsp60*<sup>flox/flox</sup> control mice (N=3) (B) Ratio of mitochondrial to nuclear DNA measured by qPCR in IEC isolated from villi and crypt of *Hsp60*<sup>ΔIEC</sup> mice and *Hsp60*<sup>flox/flox</sup> control mice (N=6). (C) Representative images of jejunal sections from *Hsp60*<sup>ΔIEC</sup> and *Hsp60*<sup>flox/flox</sup> control mice stained via TUNEL assay to assess apoptotic DNA fragmentation including detailed images in higher magnification (DAPI stains nuclei in cyan). Quantification of TUNEL positive cells per crypt-villus unit (N=5). Positive controls from DNaseI treated tissue sections are indicated by white arrows. Lines in the dot plots indicate mean numbers. Statistical analyses were performed via t-tests comparing genotypes.

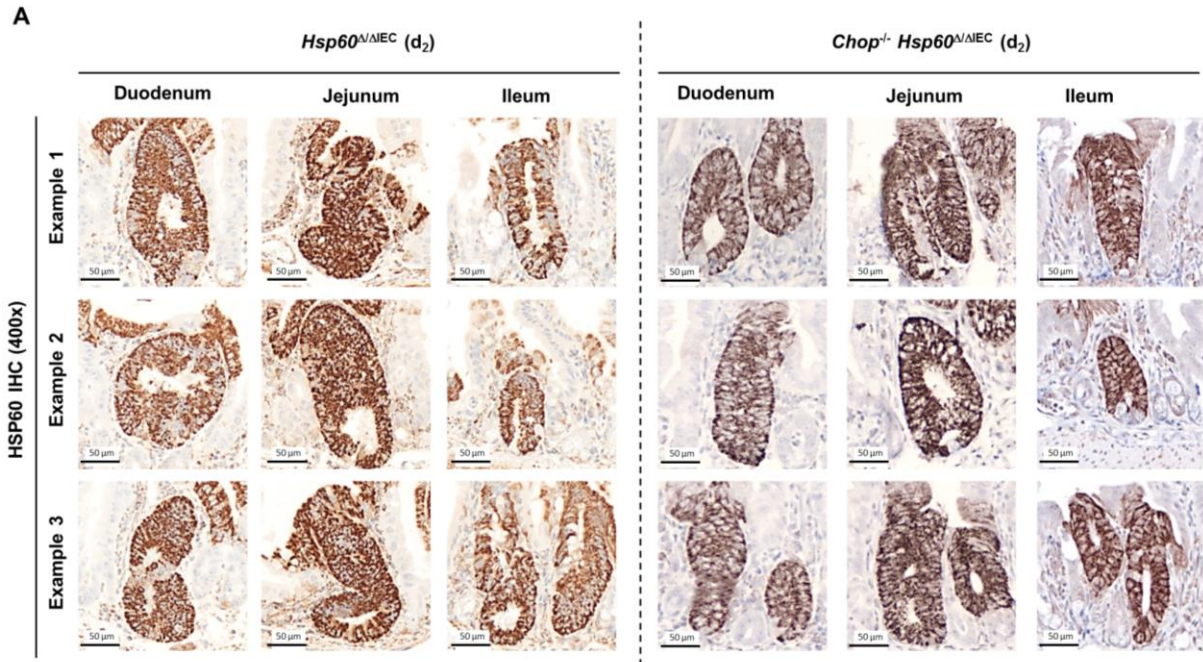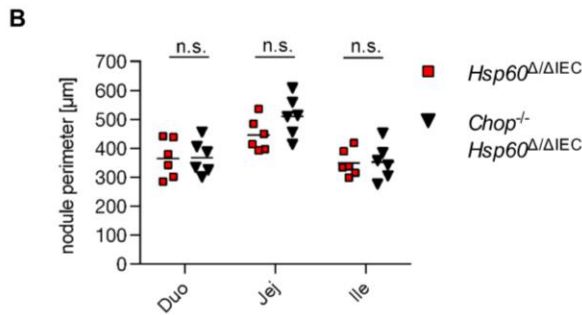

**Supplementary Figure 4: Quantification of hyperproliferative, HSP60-positive crypt nodules induced by HSP60 loss in *Hsp60<sup>ΔIEC</sup>* and in *Chop<sup>-/-</sup> Hsp60<sup>ΔIEC</sup>* mice**

(A) Representative HSP60 IHC stainings of *Hsp60<sup>ΔIEC</sup>* and *Chop<sup>-/-</sup> Hsp60<sup>ΔIEC</sup>* mice along the small intestinal tract following proximal to distal compartments. (B) HSP60-positive crypt nodules were quantified along the intestinal tract using HSP60 IHC staining. Comparison of nodule perimeter of HSP60-positive crypt nodules of *Hsp60<sup>ΔIEC</sup>* and *Chop<sup>-/-</sup> Hsp60<sup>ΔIEC</sup>* mice (N=6) revealed no differences between genotypes. Lines in the dot plot indicate mean numbers. Statistical analyses were performed via t-tests comparing genotypes.



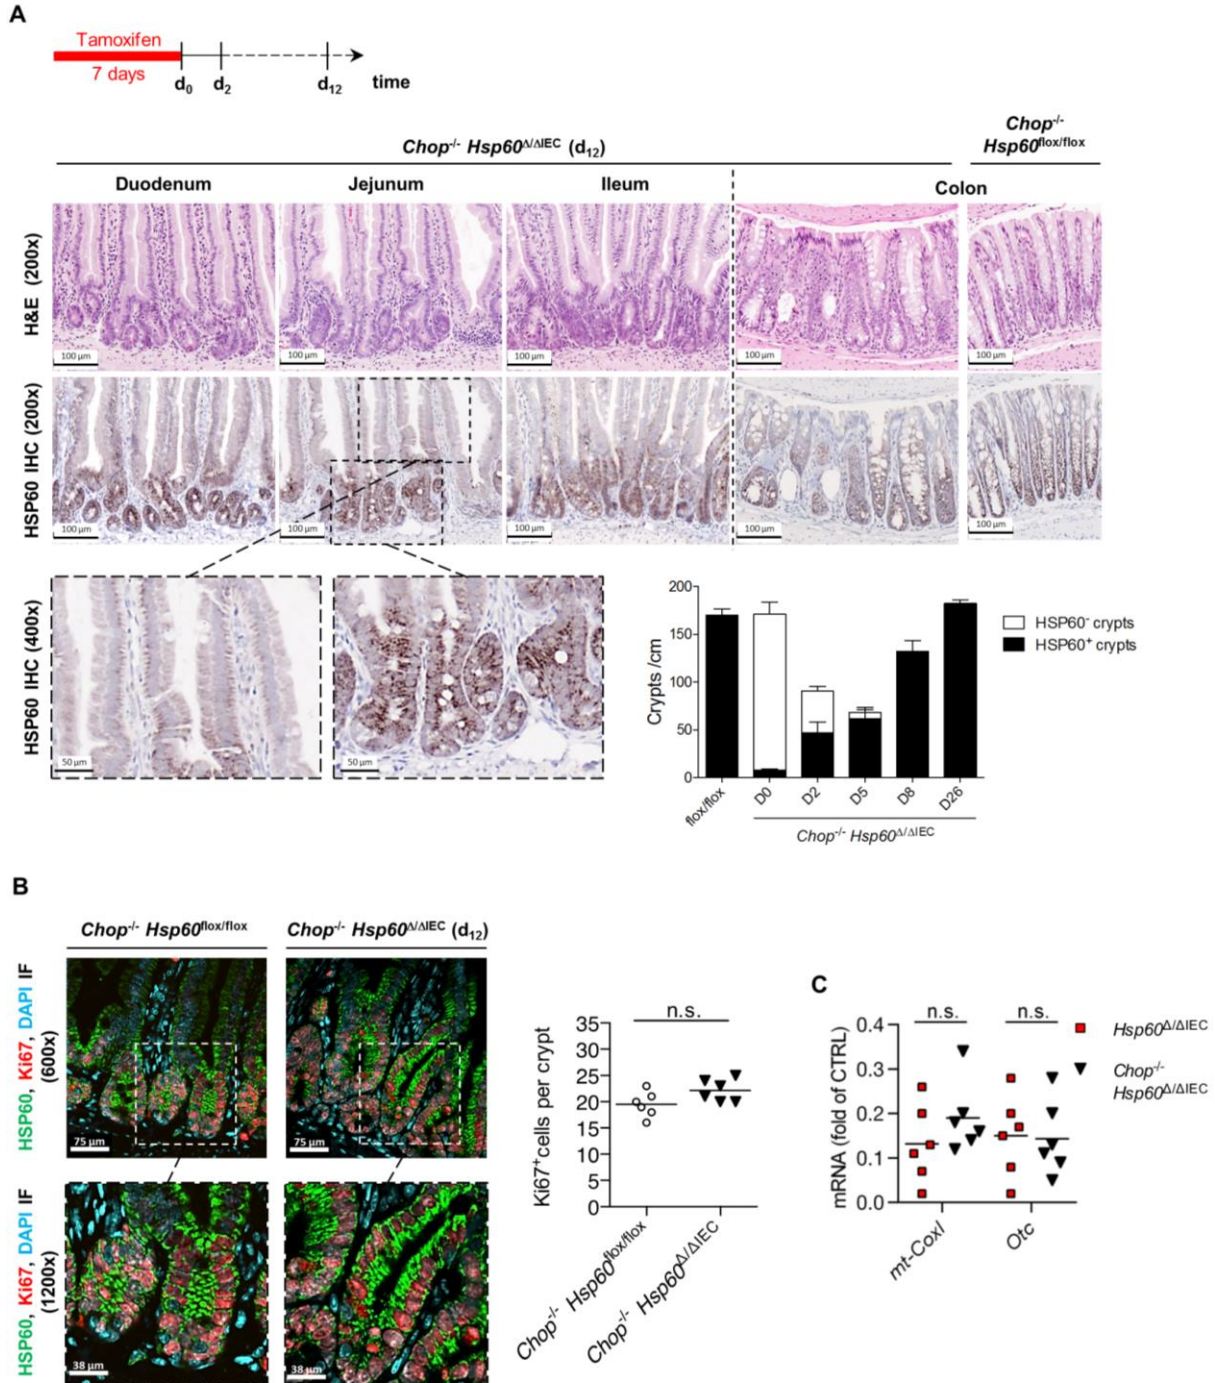

Supplementary Figure 5: Epithelial regeneration in *Chop*<sup>-/-</sup> *Hsp60*<sup>Δ/ΔIEC</sup> mice

(A) Schedule for oral tamoxifen administration to induce HSP60 deficiency and subsequent regeneration time. Representative H&E and corresponding HSP60 IHC stainings of *Chop*<sup>-/-</sup> *Hsp60*<sup>ΔIEC</sup> mice along the intestinal tract following proximal to distal compartments. Detailed images of HSP60 IHC in higher magnification distinguish villus vs. crypt regions of the jejunum. Quantification of HSP60-positive and HSP60-negative crypt numbers of *Chop*<sup>-/-</sup> *Hsp60*<sup>ΔIEC</sup> mice (N=4) at different time points after *Hsp60* deletion indicate rapid tissue reconstitution. Bars represent mean +SEM. (B) IF Co-staining of HSP60 (green) and Ki67 (red) on jejunal sections including detailed images in higher magnification of *Chop*<sup>-/-</sup> *Hsp60*<sup>ΔIEC</sup> mice and *Chop*<sup>-/-</sup> *Hsp60*<sup>lox/lox</sup> controls (DAPI stains nuclei in cyan). Quantification of Ki67-positive cells in HSP60-positive and HSP60-negative crypts (N=5; 2 regions per mouse). (C) qPCR analysis of *mtCoxI* and *Otc* mRNA expression in IEC isolated from the crypt compartment of *Hsp60*<sup>ΔIEC</sup> and *Chop*<sup>-/-</sup> *Hsp60*<sup>ΔIEC</sup> mice. Lines in the dot plots indicate mean numbers. Statistical analyses were performed via unpaired t-tests comparing genotypes.

A

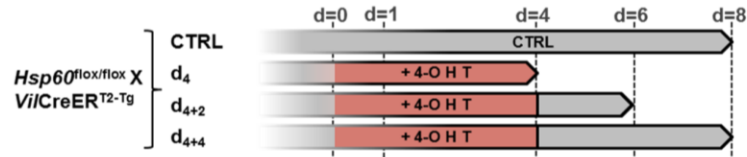

B

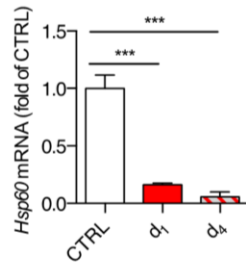

C

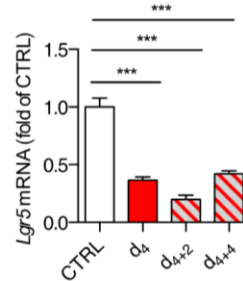

### Supplementary Figure 6: Expression of *Hsp60* and *Lgr5* following tamoxifen treatment of organoids

(A) Schematic illustration of the experimental setup using small intestinal organoids. Organoids were isolated from *Hsp60*<sup>flox/flox</sup>, *VillinCreER*<sup>T2-Tg</sup> mice and distributed to four protocols. (B) mRNA expression levels of *Hsp60* at d<sub>1</sub> and d<sub>4</sub>, respectively, after tamoxifen treatment. (C) qRT-PCR analysis of *Lgr5* mRNA expression after tamoxifen treatment. Bars represent mean +SEM. Asterisk indicate significant differences \*\*\*P<0.001. One-Way ANOVA and appropriate post-hoc tests were used for all statistical analyses. Data from organoid experiments derive from at least 3 independent experiments.



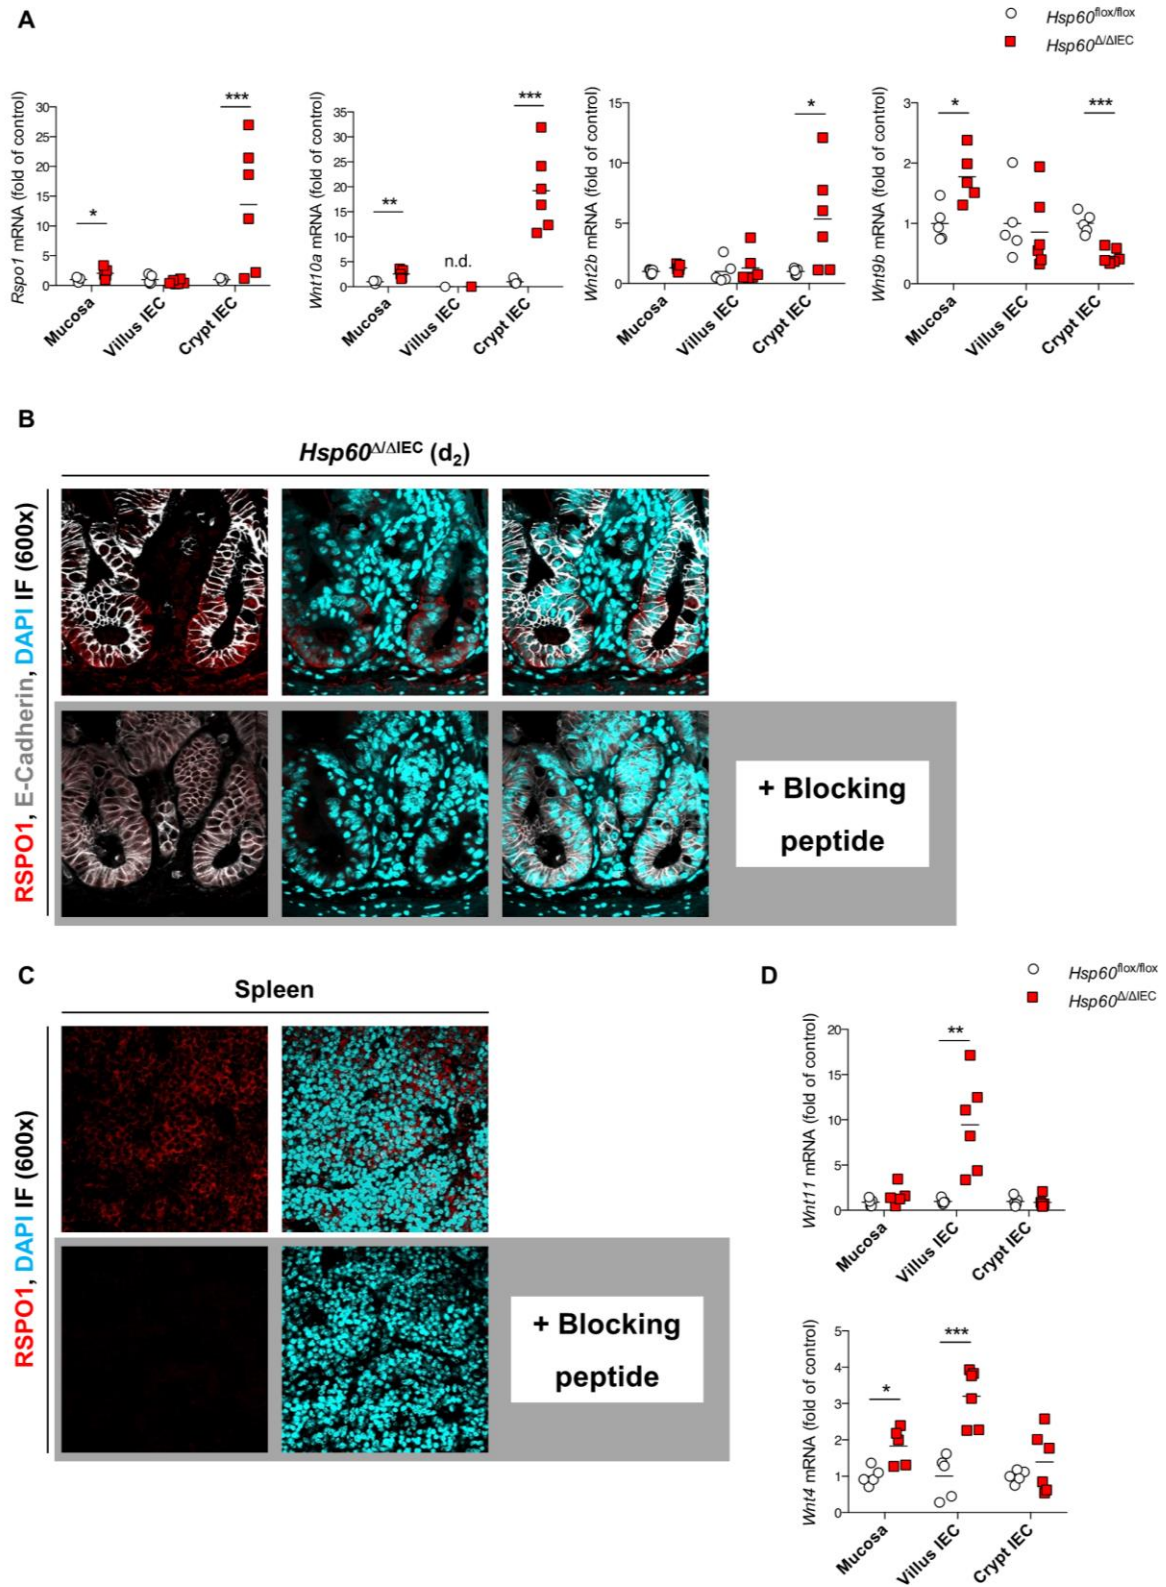

Supplementary Figure 7: Epithelial expression of WNT-related factors and RSPO1 antibody validation

(A) mRNA expression pattern of WNT-related factors found to be significantly altered in crypt-derived IEC from *Hsp60*<sup>ΔIEC</sup> mice in mucosal tissue (Mucosa), villus-derived IEC and crypt-derived IEC from *Hsp60*<sup>fllox/fllox</sup> and *Hsp60*<sup>ΔIEC</sup> mice. Gene regulation is enriched in crypt-derived IEC fractions. (B) IF stainings of RSPO1 (red) and E-Cadherin (grey) at d<sub>2</sub> in jejunal sections from *Hsp60*<sup>ΔIEC</sup> mice. A specific blocking peptide was used on consecutive sections (lower panel) with otherwise unchanged staining protocol (DAPI stains nuclei in cyan). (C) IF staining of RSPO1 (red) in splenic sections serving as positive tissue control. A specific blocking peptide was used on consecutive sections (lower panel) with otherwise unchanged staining protocol (DAPI stains nuclei in cyan). (D) mRNA expression pattern of WNT-related factors found to be significantly altered in villus-derived IEC from *Hsp60*<sup>ΔIEC</sup> mice in mucosal tissue (Mucosa), villus-derived IEC and crypt-derived IEC from *Hsp60*<sup>fllox/fllox</sup> and *Hsp60*<sup>ΔIEC</sup> mice. Gene regulation is enriched in villus-derived IEC fractions. Lines in the dot plots indicate mean numbers. Asterisk indicate significant differences \*P<0.05; \*\*P<0.01; \*\*\*P<0.001. All statistical analyses were performed via unpaired t-tests comparing genotypes.

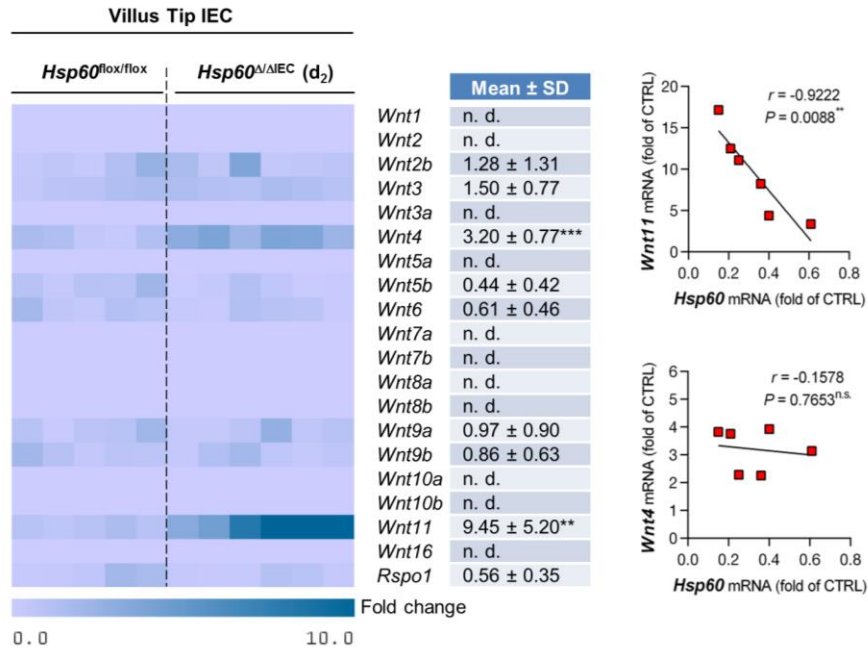

### Supplementary Figure 8: HSP60-deficient villus IEC express WNT factors

Left: qRT-PCR analysis of known WNT ligands including the WNT enhancer *Rspo1* in IEC isolated from villus tip epithelium of *Hsp60*<sup>ΔIEC</sup> (N=6) vs. *Hsp60*<sup>fllox/fllox</sup> mice (N=5). Statistical analysis was performed via t-test comparing genotypes at each time point. Asterisk indicate significant differences \*\*P<0.01; \*\*\*P<0.001. Right: Correlation analysis (Pearson) of significantly regulated WNT factors compared to HSP60 levels in *Hsp60*<sup>ΔIEC</sup> mice (the straight line indicates linear regression). P values indicate one-sided significance.

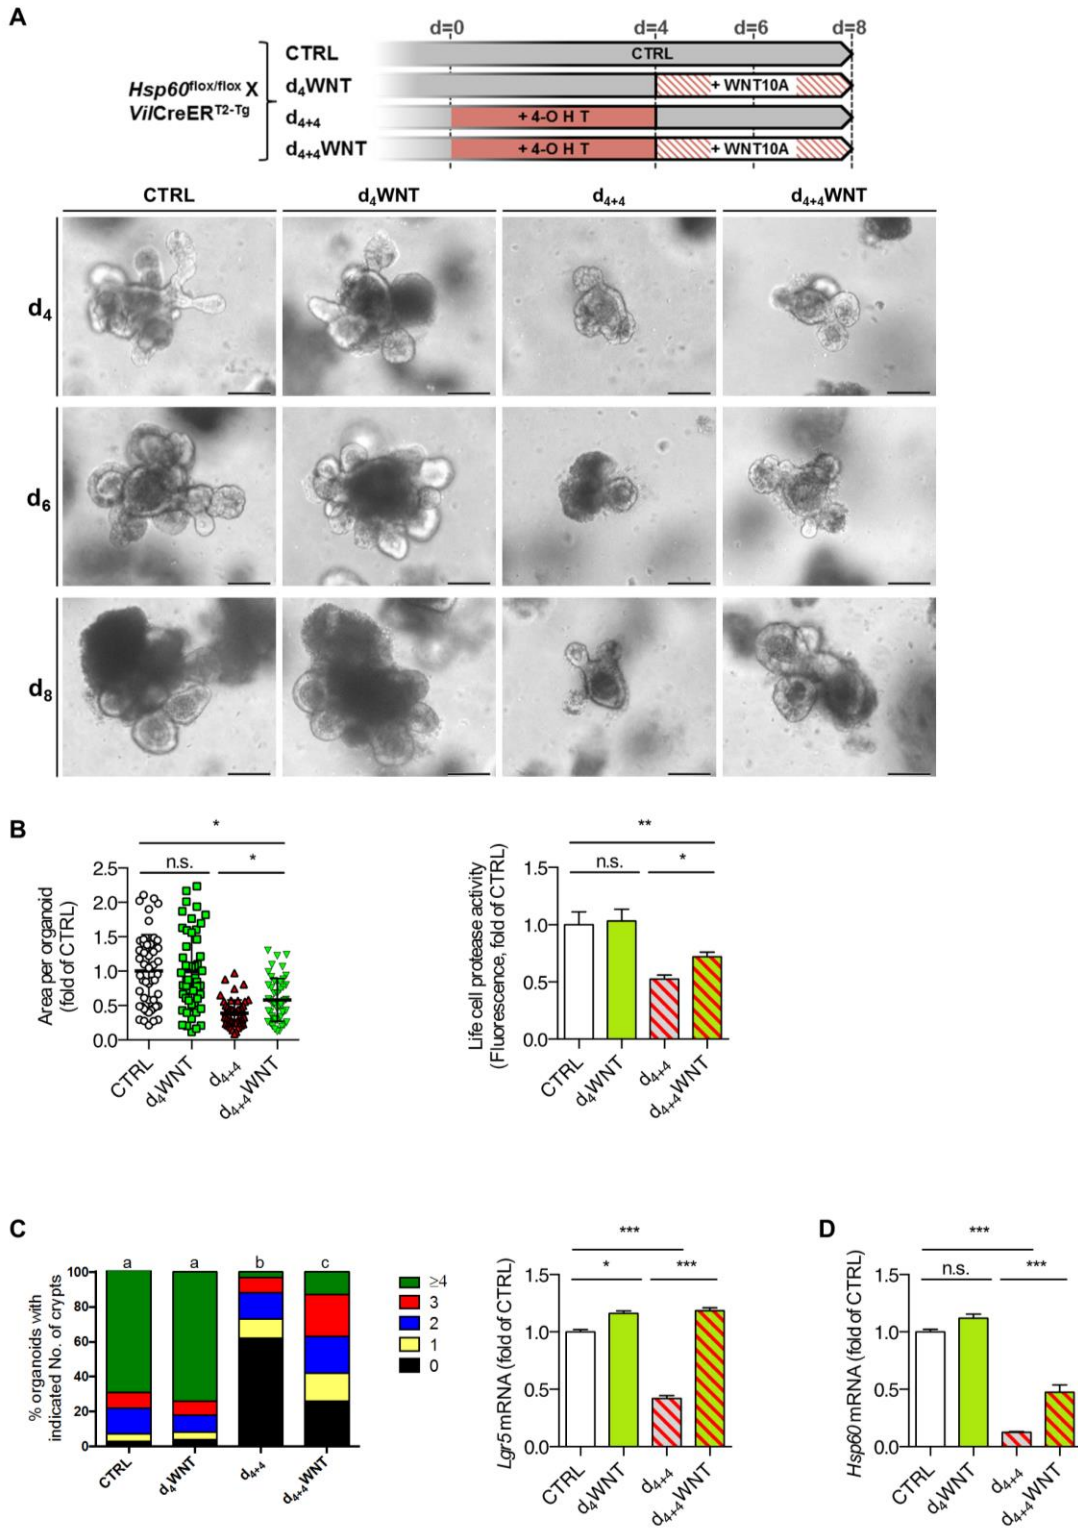

Supplementary Figure 9: WNT10A rescues intestinal organoid growth after HSP60 knockout

Organoids were isolated from *Hsp60*<sup>flox/flox</sup>, *VillinCreER*<sup>T2-Tg</sup> mice and distributed to four protocols. (A) Experimental scheme to show the effects of d WNT10A supplementation (100ng/mL) on *Hsp60* deficient small intestinal organoids. Lower panel: representative pictures of the indicated treatments and time points. (B) Measurement of organoid area (left) and life cell protease activity measured by fluorescence (right) following indicated treatments. (C) Quantification of *de novo* crypt formation (left); a, b, c, significantly different from each other, Kruskal–Wallis test on ranks followed by Dunn’s test. Right: qRT-PCR analysis of *Lgr5* mRNA expression in organoids in response to WNT10A treatment. (D) qPCR analysis of *Hsp60* mRNA expression. Bars represent mean +SEM. Asterisk indicate significant differences \*P<0.05; \*\*P<0.01; \*\*\*P<0.001. Unless otherwise indicated, One-Way ANOVA and appropriate post-hoc tests were used for all statistical analyses. Data from organoid experiments derive from at least 3 independent experiments.



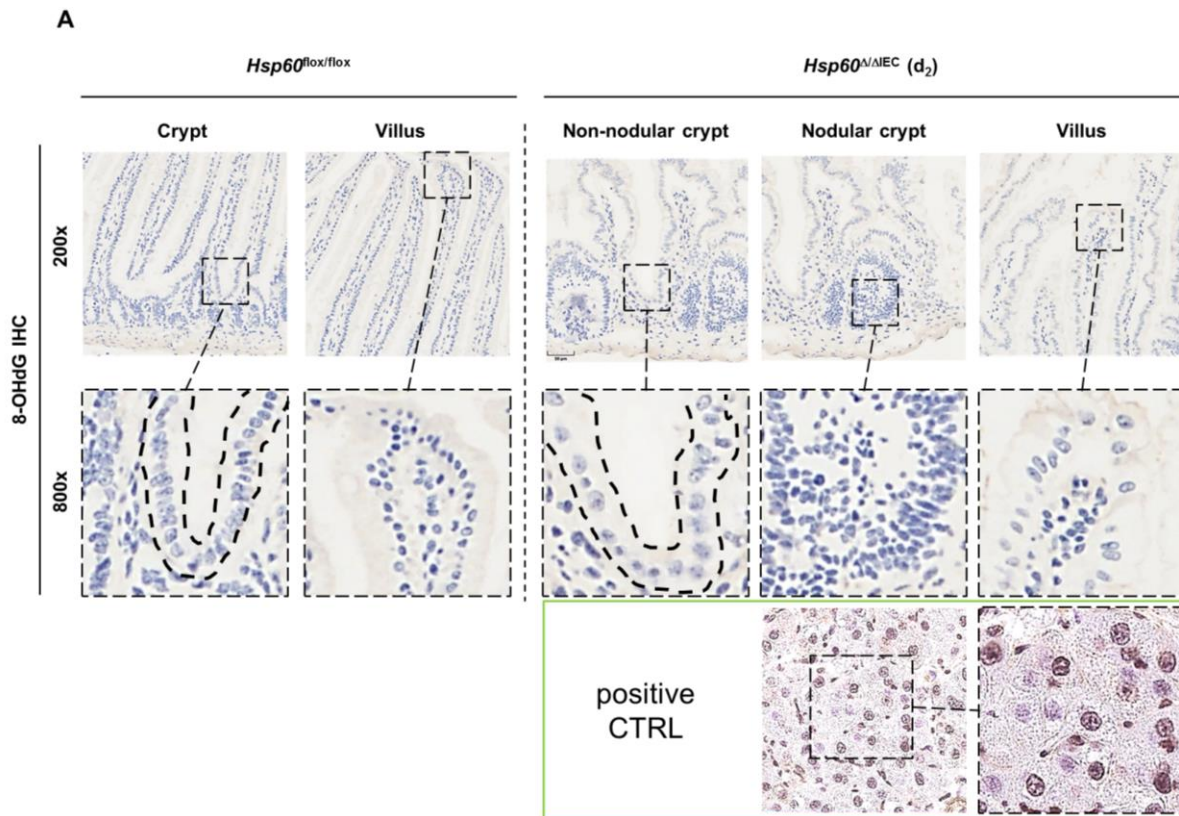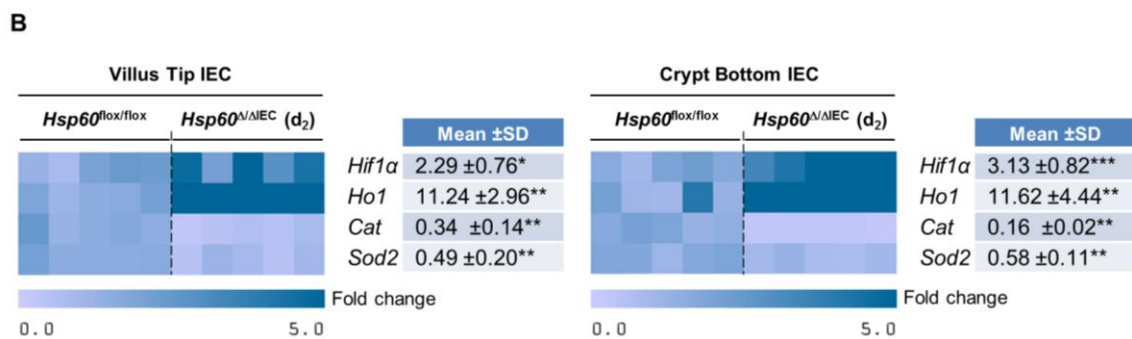

**Supplementary Figure 10: Oxidative stress associated with HSP60 deficiency-induced mitochondrial dysfunction seems to play a minor role in IEC**

(A) Representative 8-OHdG IHC stainings of *Hsp60<sup>Δ/ΔIEC</sup>* and *Hsp60<sup>flx/flx</sup>* control mice. Detailed images of 8-OHdG IHC in higher magnification distinguish villus vs. hyperproliferative nodules/non-nodular crypt regions of the jejunum. Positive control: tissue showing neoplastic changes associated with inflammation. (B) qRT-PCR analysis of oxidative stress-associated genes in IEC isolated from *Hsp60<sup>Δ/ΔIEC</sup>* and *Hsp60<sup>flx/flx</sup>* control mice (N=5). Asterisk indicate significant differences \*P<0.05; \*\*P<0.01; \*\*\*P<0.001. Statistical analyses were performed using unpaired t-test.

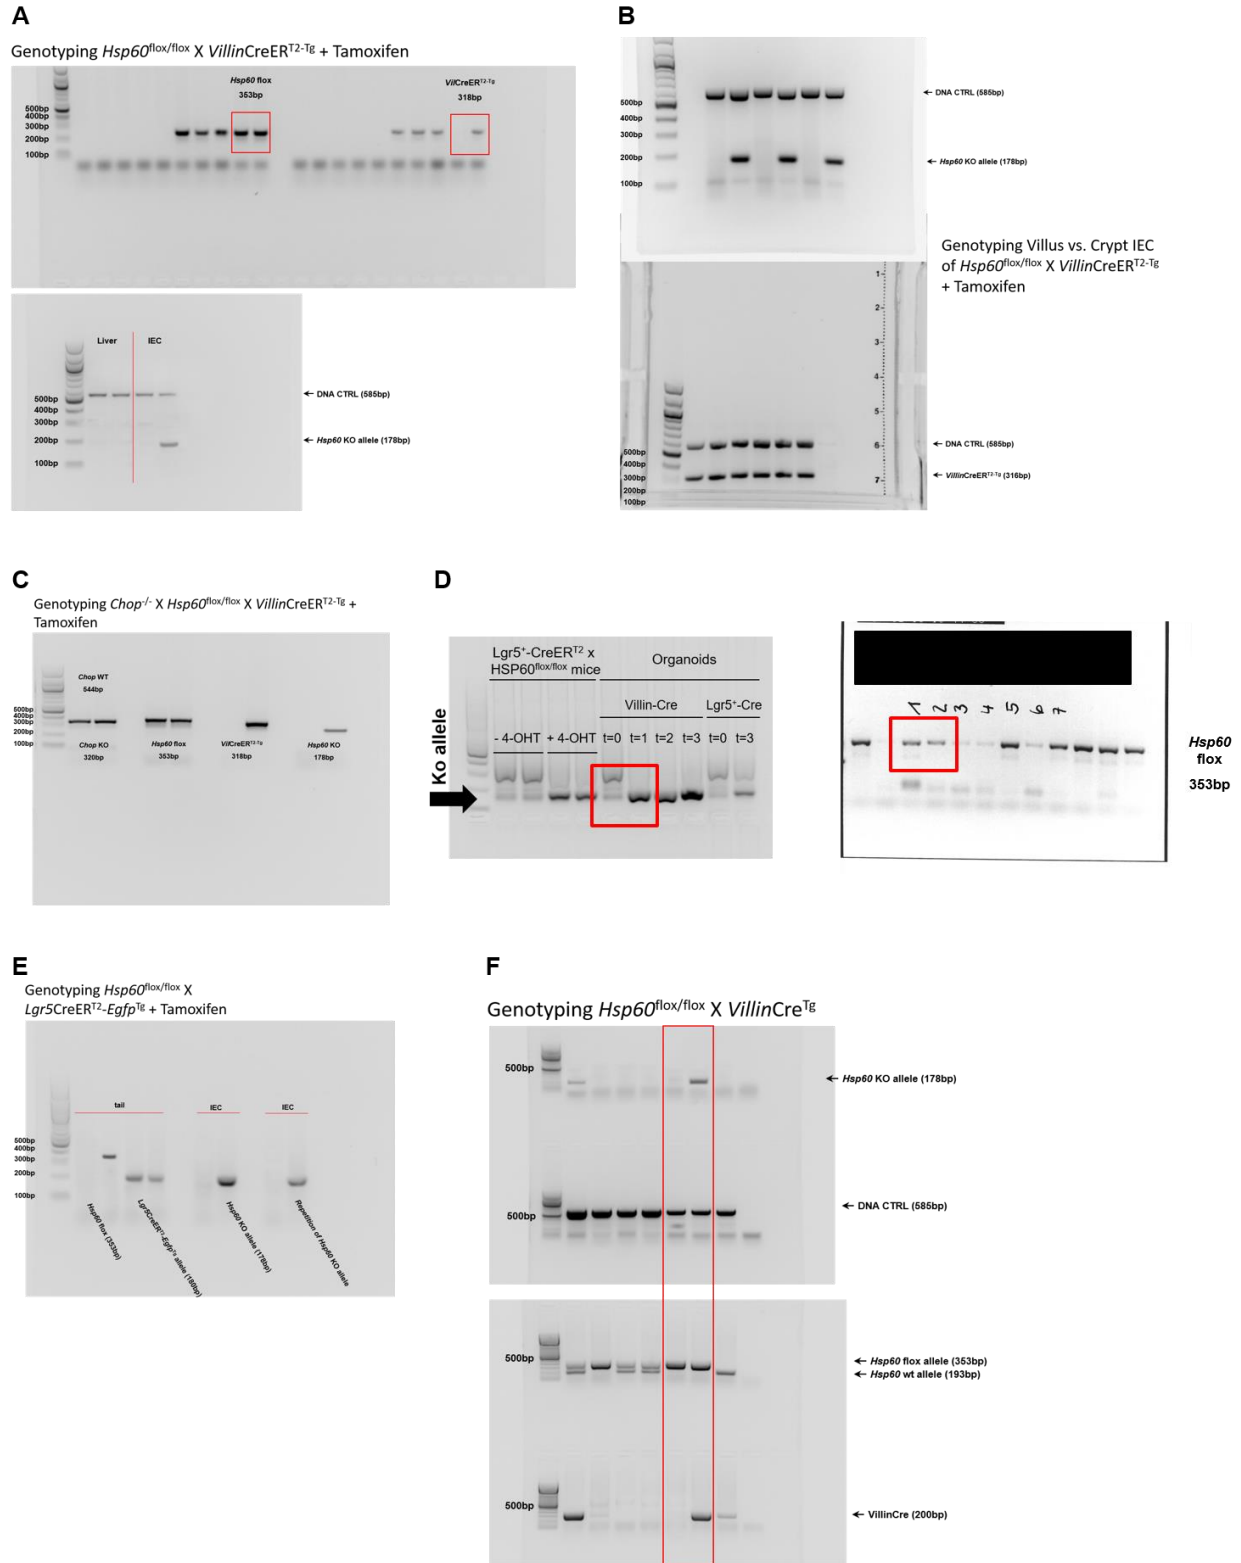

Supplementary Figure 11: Uncropped versions of agarose gels from the main figures

Uncropped versions of agarose gels shown in (A) Figure 1B, (B) Figure 1D, (C) Figure 2, (D) Figure 4C, (E) Figure 6A, (F) Supplementary Figure 1B.

**Supplementary Table 1. Primer sequences for genotyping**

| <b>Allele</b>     | <b>Primers (5' → 3')</b>                           | <b>Allele</b>                                                | <b>Primers (5' → 3')</b>                     |
|-------------------|----------------------------------------------------|--------------------------------------------------------------|----------------------------------------------|
| <i>Hsp60</i> KO   | tctgcctgcttcttctgcctca<br>accagaacaacctcaggcctcaat | <i>VillinCre</i> <sup>Tg</sup>                               | caagcctggctcgacggcc<br>cggaacatcttcaggttct   |
| <i>Hsp60</i> flox | accaagaccctgtactcttaacc<br>aactgacctagatggtgtgtgg  | <i>VillinCreER</i> <sup>T2-Tg</sup>                          | accatccaccgagtc<br>aggaatgcatgaagtag         |
| <i>Chop</i> KO    | atgcccttacctatcgtg<br>aacgccagggtttcccagtca        | <i>Lgr5CreER</i> <sup>T2-</sup><br><i>Egfp</i> <sup>Tg</sup> | cactgcattctagttgtgg<br>cggtgcccgcagcgag      |
| <i>Chop</i> WT    | atgcccttacctatcgtg<br>gcagggtcaagagtagtg           | DNA control                                                  | gagactctggctactcatcc<br>cctcagcaagagctggggac |

**Supplementary Table 2. Antibodies and dilutions used for IF, IHC and WB**

| <b>Primary antibodies:</b>               | <b>Companies:</b>                        | <b>Dilutions:</b>     |
|------------------------------------------|------------------------------------------|-----------------------|
| anti-HSP60 (goat /rabbit (WB))           | Santa Cruz Biotechnology, Santa Cruz, CA | 1:200/<br>1:1000 (WB) |
| anti-Ki67 (rabbit)                       | abcam, Cambridge, UK                     | 1:400                 |
| anti-OLFM4 (rabbit)                      | Biorbyt, Cambridge, UK                   | 1:200                 |
| anti-RSPO1 (rabbit)                      | Sigma-Aldrich                            | 1:100                 |
| anti-GFP (rabbit)                        | Cell Signalling Technology, Danvers, MA  | 1:100                 |
| anti-E-Cadherin (mouse)                  | abcam, Cambridge, UK                     | 1:300                 |
| anti- $\alpha$ SMA (mouse)               | abcam, Cambridge, UK                     | 1:100                 |
| anti-WNT10A (rabbit)                     | abcam, Cambridge, UK                     | 1:100                 |
| anti-Lysozyme (goat)                     | Santa Cruz Biotechnology, Santa Cruz, CA | 1:25                  |
| anti-Citrate synthase (rabbit)           | abcam, Cambridge, UK                     | 1:500 (WB)            |
| anti- $\beta$ -Actin                     | Cell Signalling Technology, Danvers, MA  | 1:1000                |
| anti-8-OHdG (mouse)                      | abcam, Cambridge, UK                     | 1:1000                |
| Alexa Flour 488 anti-mouse F4/80         | Biolegend, San Diego, CA                 | 1:1000                |
| <b>Secondary antibodies:</b>             | <b>Companies:</b>                        | <b>Dilutions:</b>     |
| HRP-conjugated donkey anti-rabbit IgG    | dianova, Hamburg, Germany                | 1:300                 |
| HRP-conjugated donkey anti-goat IgG      | Sigma-Aldrich, St. Louis, MO             | 1:300                 |
| Biotin-conjugated donkey anti-rabbit IgG | abcam, Cambridge, UK                     | 1:500                 |
| Alexa Fluor donkey anti-goat 488/ 546    | Life Technologies, Carlsbad, CA          | 1:200                 |
| Alexa Fluor donkey anti-rabbit 546       | Life Technologies, Carlsbad, CA          | 1:200                 |
| Alexa Fluor donkey anti-mouse 647        | Life Technologies, Carlsbad, CA          | 1:200                 |



**Supplementary Table 3. Primer sequences for quantitative real-time PCR and UPL probe number**

| Gene          | Primers (5' → 3')                               | Probe | Gene          | Primers (5' → 3')                                | Probe |
|---------------|-------------------------------------------------|-------|---------------|--------------------------------------------------|-------|
| <i>Hsp60</i>  | tcttcaggttggtggcagtc<br>cccctcttctccaaacactg    | 1     | <i>Wnt7a</i>  | cgctgggagagcgtactg<br>cgataatcgcataaggtgaagg     | 12    |
| <i>Hsp10</i>  | ggcccaggtcagagtc<br>tgtcaaagagcgggaagaaactt     | 77    | <i>Wnt7b</i>  | tctgtccagcggcagttac<br>tctgttgacagatgatgttg      | 49    |
| <i>ClpP</i>   | gcaacaagaagcccattcat<br>gtactgcattgtgctgtagatgg | 26    | <i>Wnt8a</i>  | actcgggctgtgacgagt<br>cccgaactccacgtgttc         | 75    |
| <i>Chop</i>   | gcgacagagccagaataaca<br>gatgcacttcctctggaaca    | 91    | <i>Wnt8b</i>  | gcctcggagactttgacaac<br>ctcccagagccaacctt        | 76    |
| <i>mtCoxI</i> | cagaccgcaacctaacaaca<br>ttctgggtgccaaagaat      | 25    | <i>Wnt9a</i>  | cgagtggacttccaacaaca<br>ggcatttgcaagtggtttc      | 19    |
| <i>Pgc1α</i>  | gagcgaaccttaagtgtggaa<br>tcttgggtggctttatgagga  | 52    | <i>Wnt9b</i>  | ccaagagaggaagcaaggac<br>tctcaggccgctcttcac       | 105   |
| <i>Otc</i>    | gctgtcatggtatccctgct<br>tttctttgacaggcatca      | 99    | <i>Wnt10a</i> | ggcgtcctgttcttctca<br>gtcgttgggtgctgacct         | 71    |
| <i>Olfm4</i>  | gaaattcgagagagagtttctaagg<br>gaccttactcggaccgca | 92    | <i>Wnt10b</i> | aatcgggatccacaacaac<br>ctccaacaggtcttgaattgg     | 27    |
| <i>Lgr5</i>   | cttactcgggtgacgtgct<br>cagccagctaccaaataggtg    | 60    | <i>Wnt11</i>  | caggatcccaagccaataaa<br>tccagggaggcacgtaga       | 94    |
| <i>Axin2</i>  | gagagtgagcggcagagc<br>cggctgactcgttctcct        | 96    | <i>Wnt16</i>  | ccctcttggctatgagctg<br>actgcatgacctggtgacag      | 94    |
| <i>Wnt1</i>   | tactggcactgaccgctct<br>cttggatccgtcaacaggt      | 25    | <i>Rspo1</i>  | cgacatgaacaatgcatca<br>ctcctgacacttgggtcaga      | 5     |
| <i>Wnt2</i>   | cagagatcacagcctcttgg<br>gcgtaaacaaggccgatt      | 101   | <i>Tnf</i>    | tgctatgtctcagcctctc<br>gaggccattgggaactct        | 49    |
| <i>Wnt2b</i>  | ccgggaccacactgtctt<br>gctgacgagatagcatagacga    | 16    | <i>Infy</i>   | ccttggaccctctgacttg<br>agcgttcattgtctcagagcta    | 63    |
| <i>Wnt3</i>   | ctcgtggctaccaattt<br>gaggccagagatgtgactgc       | 81    | <i>Il-6</i>   | gatggatgctaccaactggat<br>ccaggtagctatggtactccaga | 6     |
| <i>Wnt3a</i>  | cttagtgctctgcagcctga<br>gagtgctcagagaggagtactgg | 76    | <i>Kc</i>     | agactccagccacactccaa<br>tgacagcgacgtcattg        | 83    |
| <i>Wnt4</i>   | actggactccctccctgtct<br>tgccctgtcactgcaaaa      | 62    | <i>Mcp-1</i>  | catccacgtgtggctca<br>gatcatctgctggtgaatgagt      | 62    |
| <i>Wnt5a</i>  | acgcttcgctgaattcct<br>cccgggcttaatatccaa        | 55    | <i>Ip-10</i>  | gctgccgtcatttctgc<br>tctcactggcccgtcatc          | 3     |
| <i>Wnt5b</i>  | agcaccgtggacaacacat<br>aaggcagtctctcggctacc     | 53    | <i>Gapdh</i>  | tccactcatggcaaatcaa<br>ttgatgttagtgggtctcg       | 9     |
| <i>Wnt6</i>   | gtgcaactgcacaacaacg<br>ggaacggaggcagcttct       | 62    |               |                                                  |       |
